# Supplementary material
Source: PubMed Central journal article supplement (PMC4498250)

**FIGURE S1**

T cell gating scheme

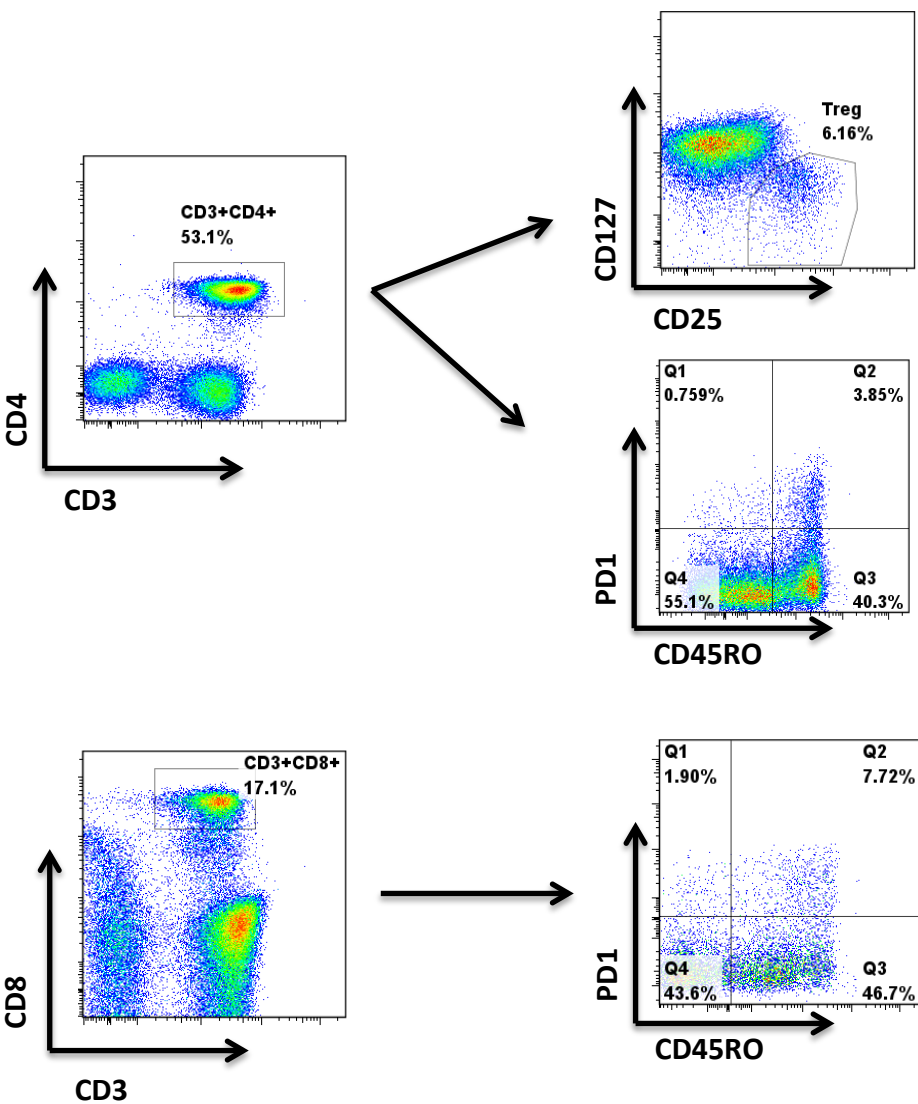

MDSC gating scheme

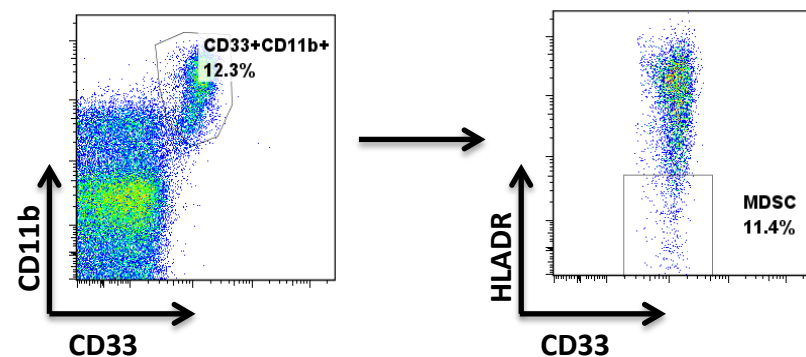

**FIGURE S2**

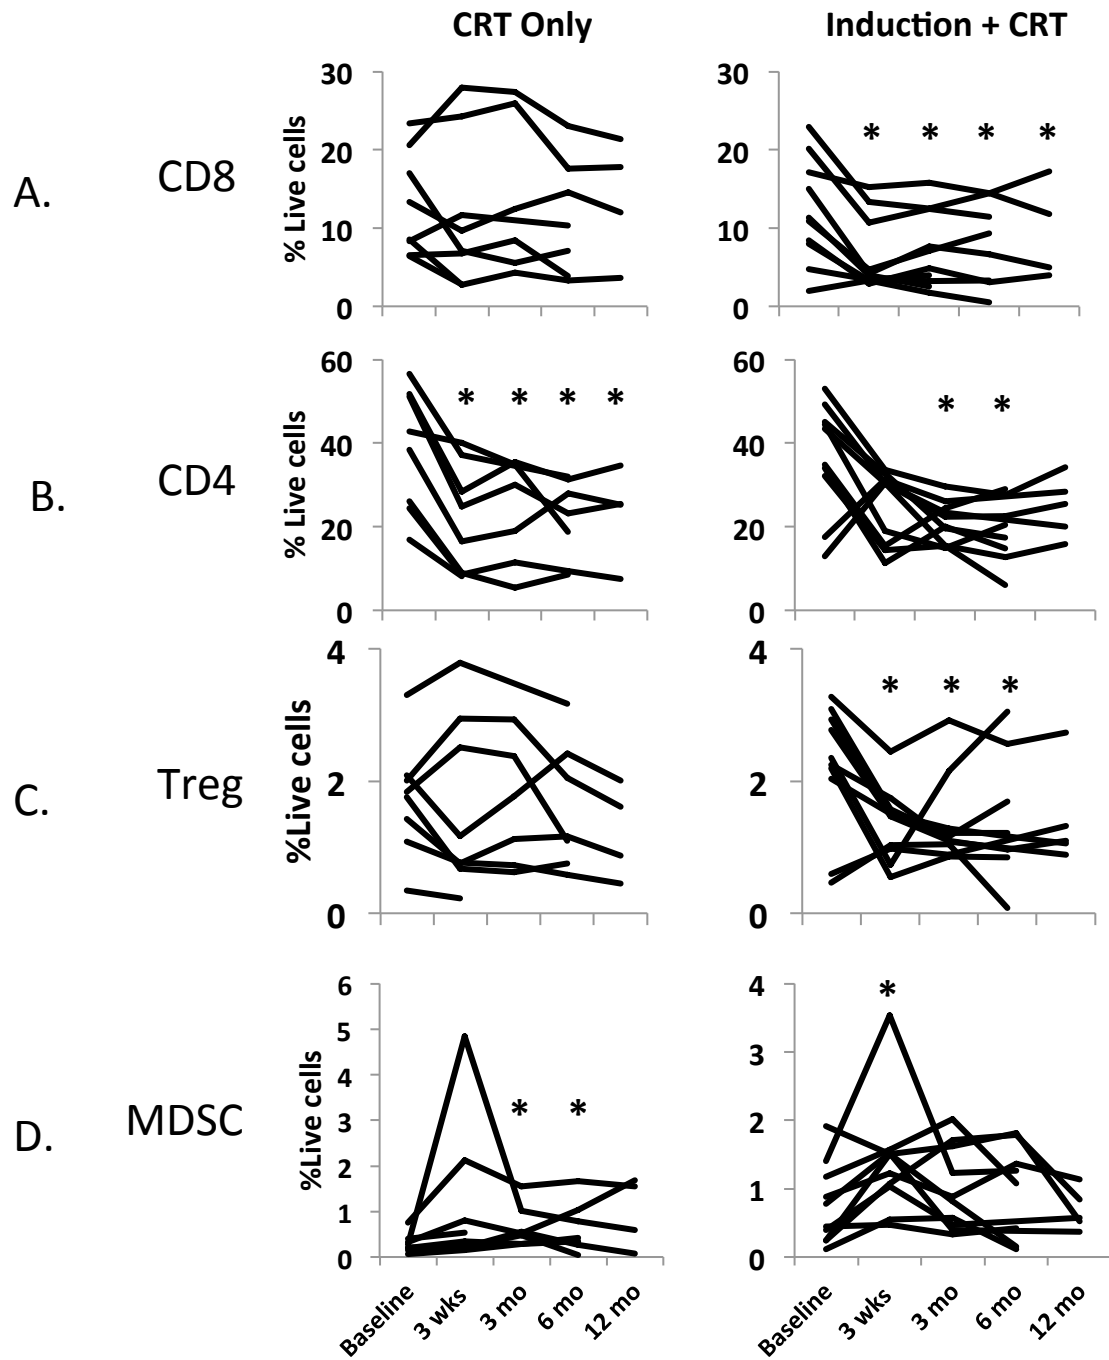

**FIGURE S3****IFN- $\gamma$** **TNF- $\alpha$** 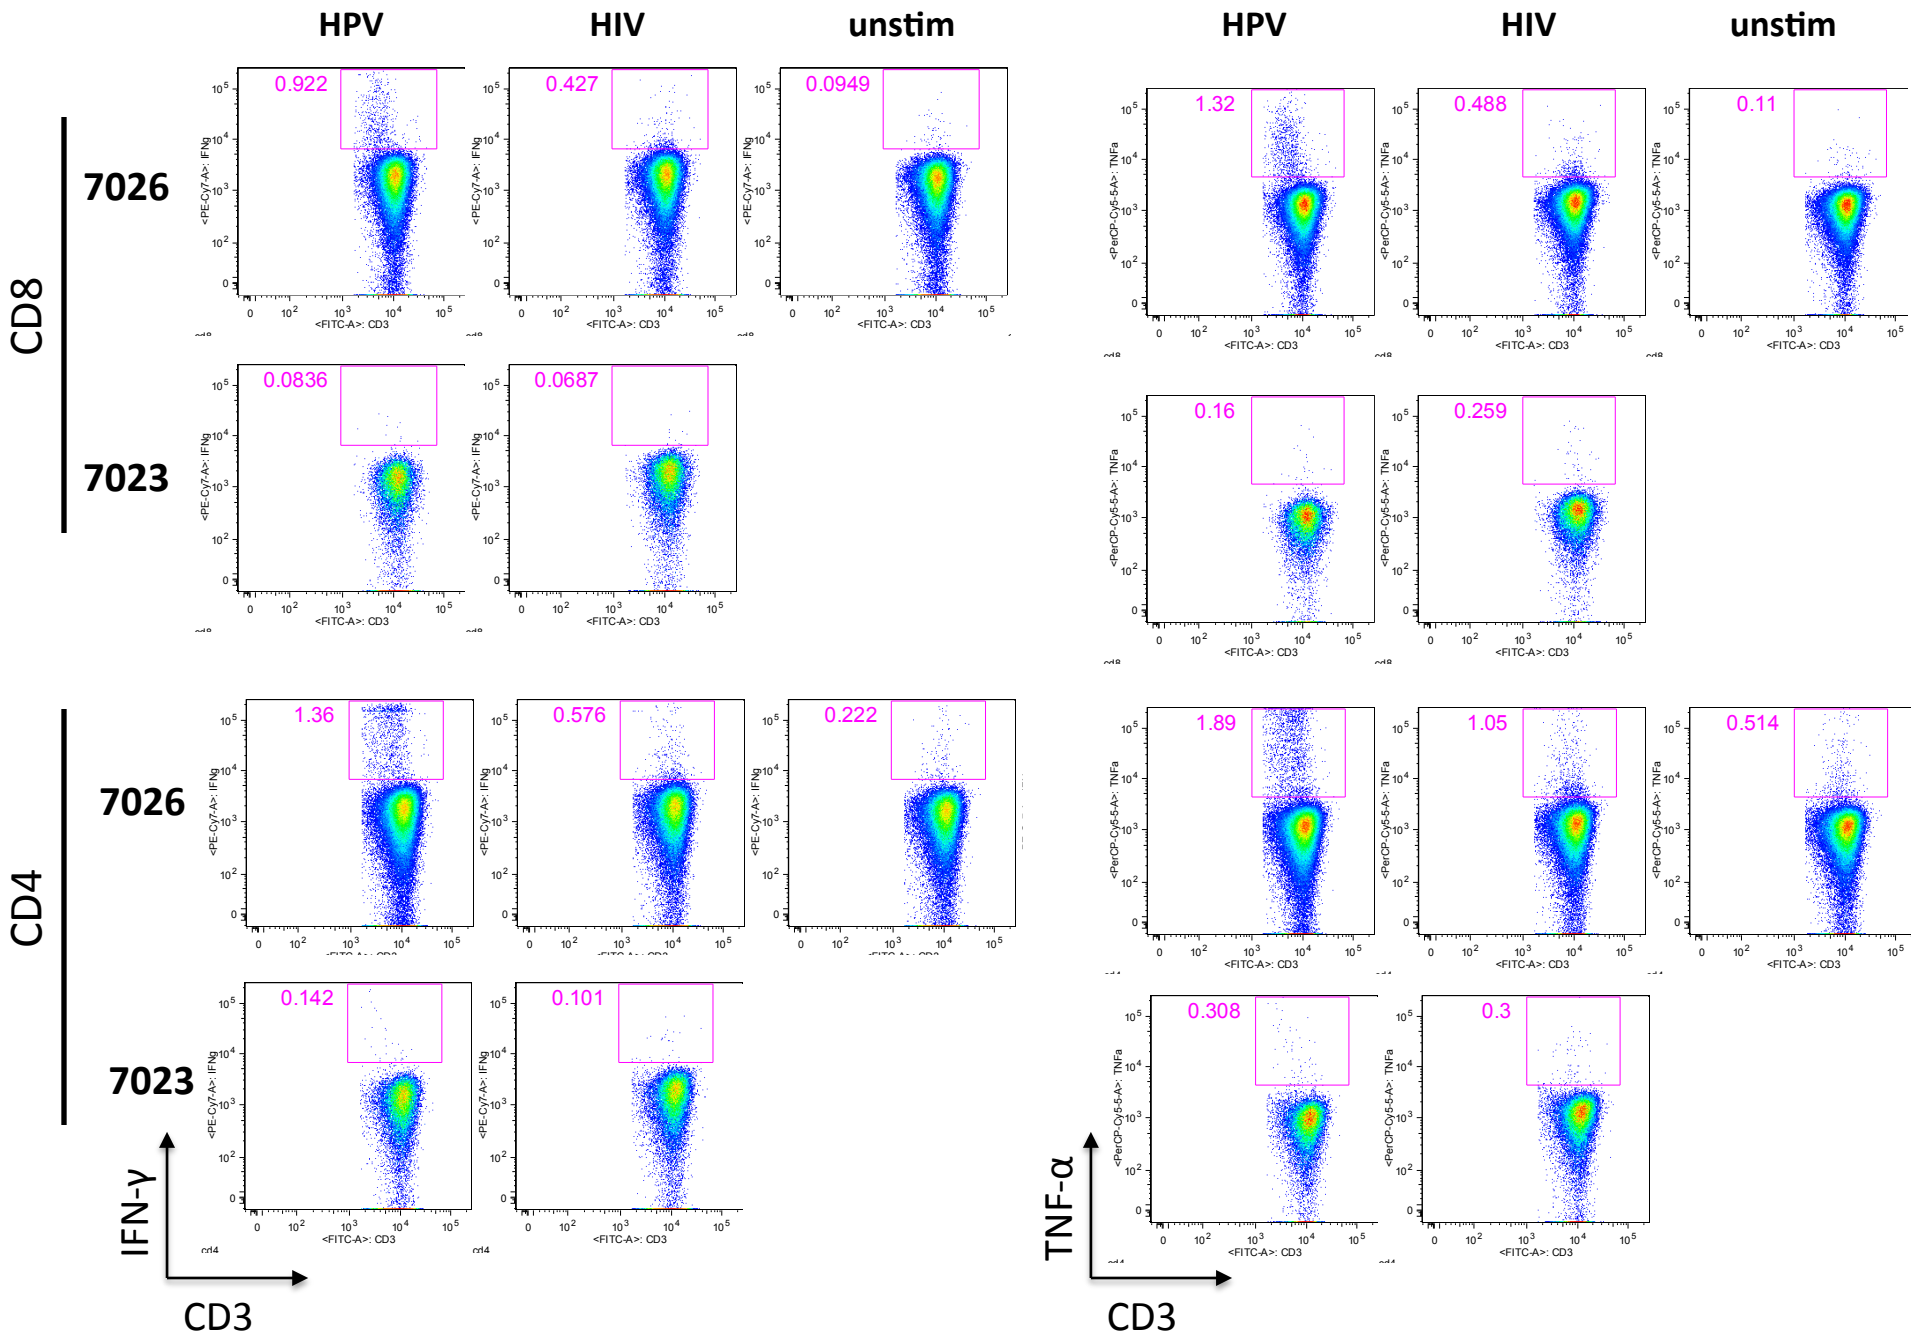

**FIGURE S4**

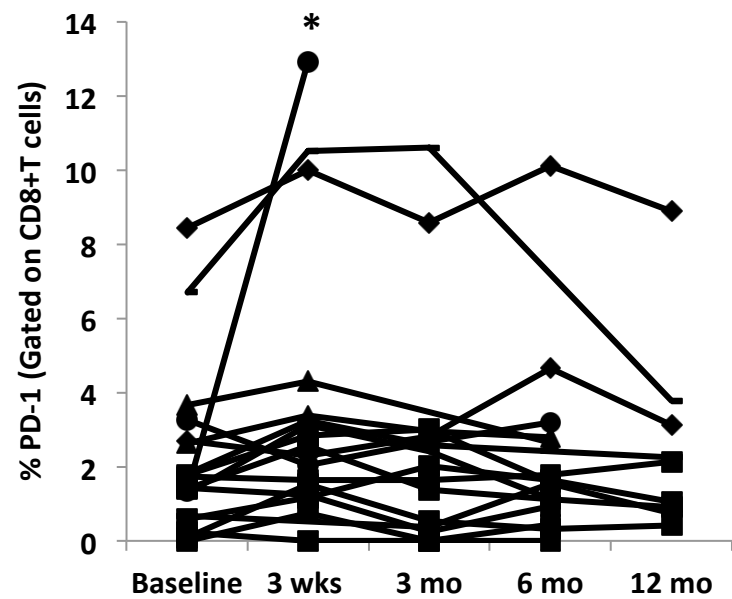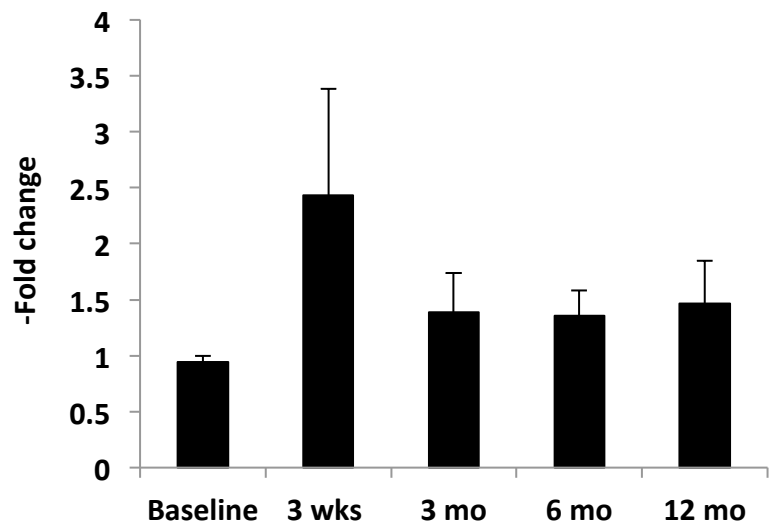

**FIGURE S5**

**A.**

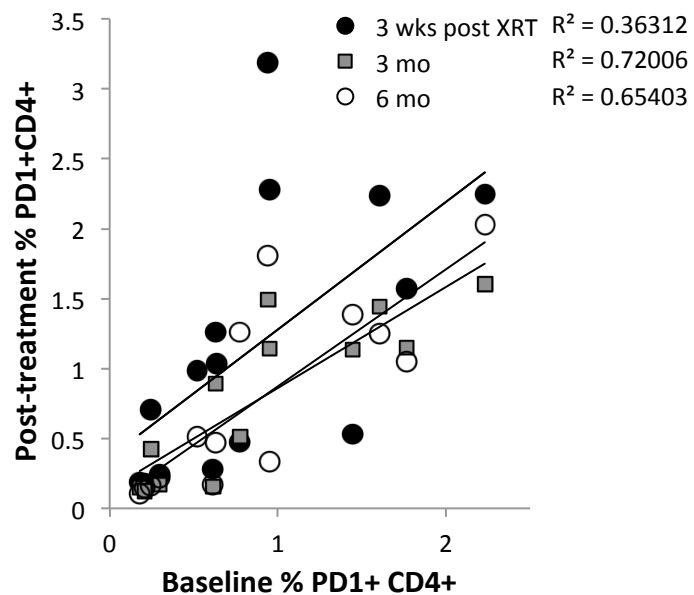

**B.**

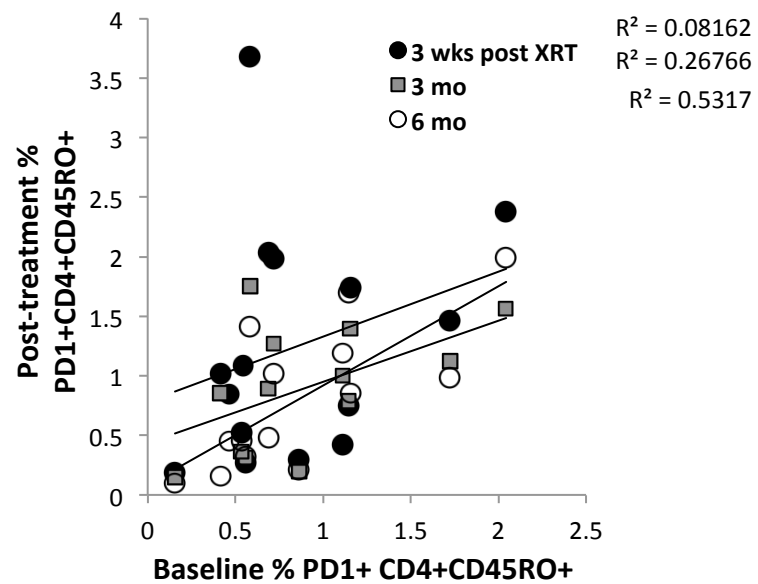

Supplement: NIHMS636259-supplement-1.pdf [file NIHMS636259-supplement-1.pdf]
