# Supplementary material
Source: PubMed Central journal article supplement (PMC4498250)
Supplement: NIHMS636259-supplement-2.pdf [file NIHMS636259-supplement-2.pdf]

## **SUPPLEMENTAL FIGURE LEGENDS:**

**FIGURE S1. Gating scheme.** Representative flow cytometry plots showing gating scheme for T cells (left) and MDSC (right).

### **FIGURE S2. Effect of chemoradiation on circulating immunocytes.**

Percentage (of all live cells) of effector and suppressive immunocytes from patients who received chemoradiation only (left column) and induction + chemoradiation (right column) Each line represents results from an individual patient. A. CD8+ T cells; B. CD4+T cells; C. regulatory T cells; and D. MDSC. \* =  $p < 0.05$  with respect to baseline.

### **FIGURE S3. Intracellular IFN- $\gamma$ and TNF- $\alpha$ staining in CD8+ and CD4+ T cells.**

Representative flow cytometry plots of IFN- $\gamma$  (left column) and TNF- $\alpha$  (right column) intracellular staining in response to HPV E6/E7 peptides from baseline samples from patients #7026 (who had baseline pooled HPV-specific cytokine responses) and #7023 (who did not have baseline pooled responses).

### **FIGURE S4. Effect of chemoradiotherapy on PD-1 expression on CD8+ T cells.**

Percent PD-1+ expressing CD8+ T cells for individual patients (left) and aggregated -fold change with respect to baseline (right). \* =  $p < 0.05$  with respect to baseline.

### **FIGURE S5. Baseline PD-1 expression is correlated with post-treatment PD-1 expression on CD4+ T cells.**

Correlation of PD-1 expression at baseline and after completion of chemoradiotherapy for: A. all CD4+ T cells; and B. CD4+CD45RO+ T cells.
