# Supplementary material
Source: PubMed Central journal article supplement (PMC4498250)
Supplement: NIHMS636259-supplement-3.pdf [file NIHMS636259-supplement-3.pdf]

### Supplementary Table 1. Absolute Numbers.

|             | Baseline   | Post induction | 3 wks post- CRT | 3 mo       | 6 mo       | 12 mo      |
|-------------|------------|----------------|-----------------|------------|------------|------------|
| <b>MDSC</b> |            |                |                 |            |            |            |
| AVG         | 17,141,881 | 7,852,182      | 5,909,452       | 5,541,611  | 6,535,290  | 6,909,853  |
| SEM         | 7,898,190  | 1,814,350      | 1,431,271       | 1,197,201  | 2,715,034  | 1,777,264  |
| <b>Treg</b> |            |                |                 |            |            |            |
| AVG         | 13,878,375 | 9,802,337      | 8,889,182       | 6,338,612  | 6,569,297  | 5,827,401  |
| SEM         | 5,980,961  | 1,376,632      | 3,523,122       | 903,586    | 1,233,947  | 738,817    |
| <b>CD4</b>  |            |                |                 |            |            |            |
| Avg         | 84,625,571 | 75,836,457     | 25,380,472      | 20,309,958 | 18,963,818 | 25,251,923 |
| SEM         | 23,203,812 | 10,646,269     | 5,954,711       | 2,461,424  | 3,812,230  | 3,823,258  |
| <b>CD8</b>  |            |                |                 |            |            |            |
| AVG         | 27,827,169 | 22,046,289     | 8,422,820       | 8,563,234  | 9,309,404  | 11,618,976 |
| SEM         | 6,678,102  | 5,022,458      | 1,972,816       | 1,687,029  | 2,261,074  | 2,757,115  |
